# Supplementary material for: Investigation of nonlinear optical properties in α-A2BB′O6 (A = Li, Na, K; B = Ti, Zr, Hf; B′ = Se, Te) by first-principles calculations
Source: Royal Society of Chemistry journal article supplement (doi:10.1039/d3cp05174a), 2024-01-01
Supplement: d3cp05174a1.pdf [file d3cp05174a1.pdf]

Investigation of nonlinear optical properties in  $\alpha$ - $A_2BB'O_6$  ( $A = \text{Li, Na, K}$ ;

$B = \text{Ti, Zr, Hf}$ ;  $B' = \text{Se, Te}$ ) by first-principles calculations

Gaojing Fang,<sup>ab</sup> Xiaojun Teng,<sup>c</sup> Luo Yan,<sup>ad</sup> Yu Wu,<sup>a</sup> Kui Xue,<sup>ad</sup> Xiaofeng Zhang,<sup>d</sup> Yi-  
min Ding,<sup>\*a</sup> Liujiang Zhou,<sup>\*ad</sup> and Qiye Wen<sup>\*ab</sup>

<sup>a</sup> Yangtze Delta Region Institute (Huzhou), University of Electronic Science and Technology of China, Huzhou 313001, China

<sup>b</sup> School of Electronic Science and Engineering, University of Electronic Science and Technology of China, Chengdu 610054, China

<sup>c</sup> Chengdu Answer Information Technology Co., LTD., Chengdu 610041, China

<sup>d</sup> School of Physics, University of Electronic Science and Technology of China, Chengdu 610054, China

## 1 Table of content

|                                                                                     |    |
|-------------------------------------------------------------------------------------|----|
| 1 Table of content.....                                                             | 2  |
| 2 The results of AIMD, phonon spectra, band and DOS of stable ABB'O .....           | 2  |
| 3 The results of AIMD and phonon spectra of unstable ABB'O .....                    | 10 |
| 4 Calculated bandgap by different functionals and experimental value for LTTO ..... | 11 |
| 5 Elastic stiffness constants .....                                                 | 11 |
| 6 Total dipole moment of unit cell .....                                            | 12 |
| 7 THz adsorption spectrum of ABB'O .....                                            | 12 |

## 2 The results of AIMD, phonon spectra, band and DOS of stable ABB'O

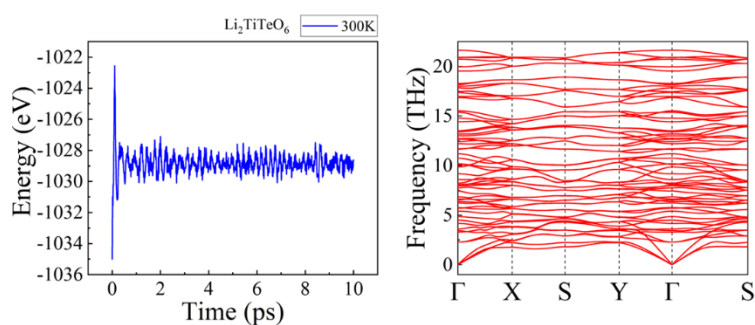

Figure S1. Energy variations under the AIMD simulations and phonon spectra at 300 K of  $\text{Li}_2\text{TiTeO}_6$  (Band and DOS are presented in main text).

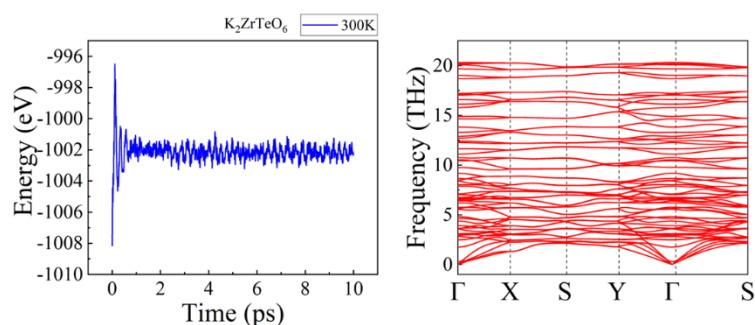

Figure S2. Energy variations under the AIMD simulations and phonon spectra at 300 K of  $\text{K}_2\text{ZrTeO}_6$  (Band and DOS are presented in main text).

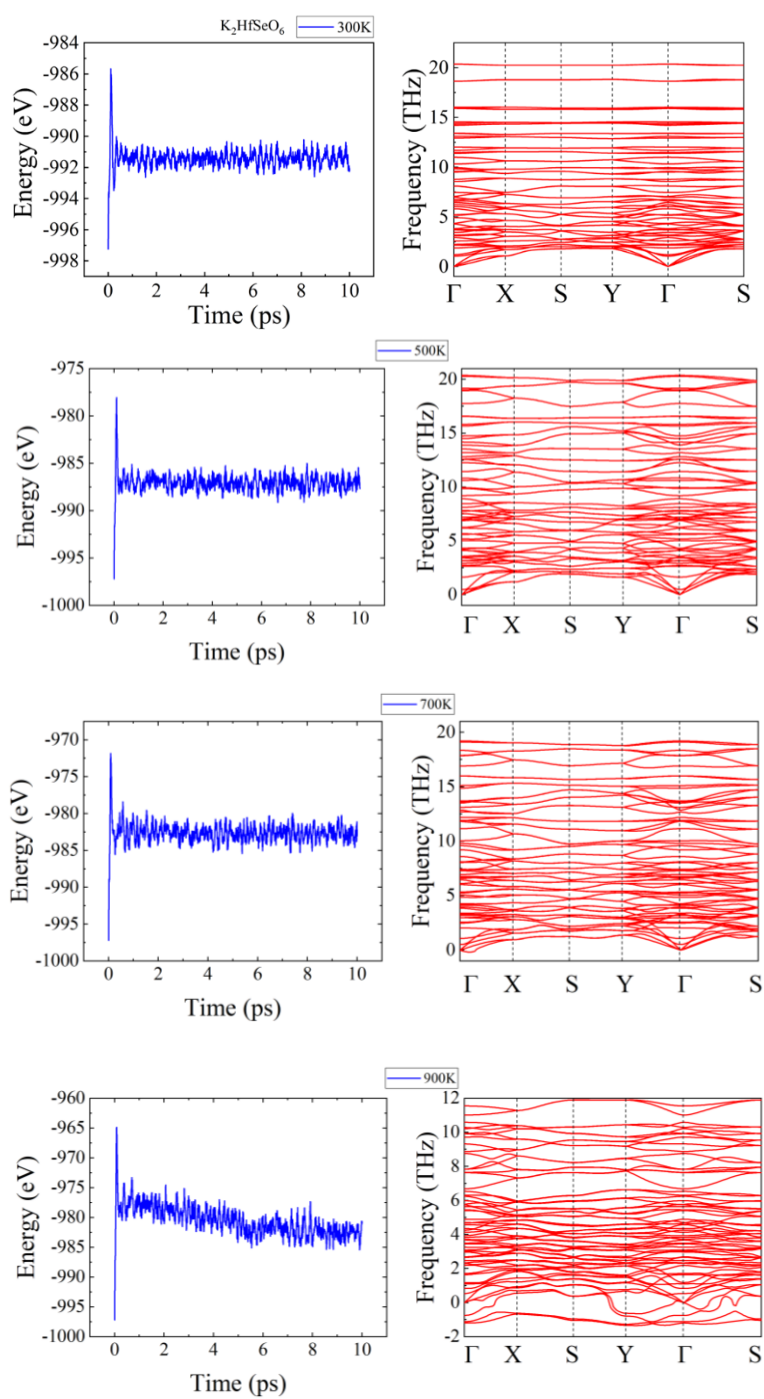

Figure S3. Energy variations under the AIMD simulations and phonon spectra at 300, 500, 700 and 900 K of  $K_2HfSeO_6$  (Band and DOS are presented in main text).

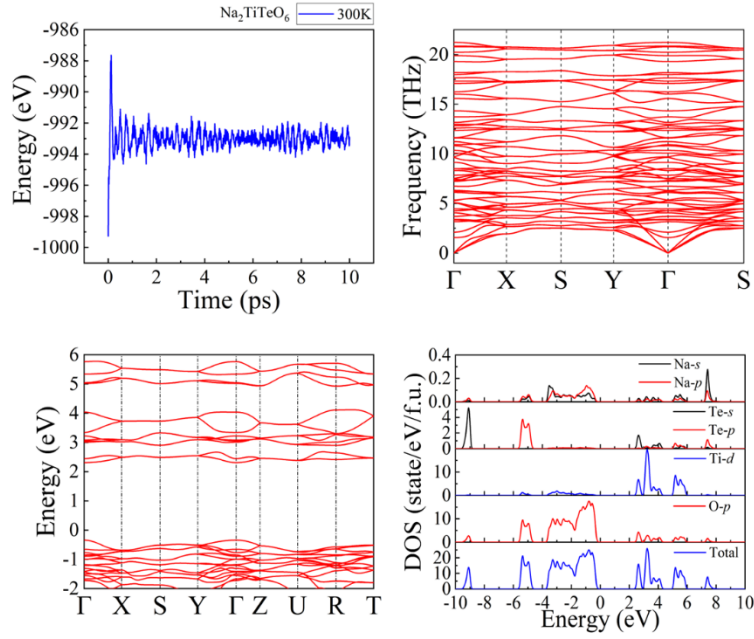

Figure S4. Energy variations under the AIMD simulations and phonon spectra at 300 K of states of  $\text{Na}_2\text{TiTeO}_6$ .

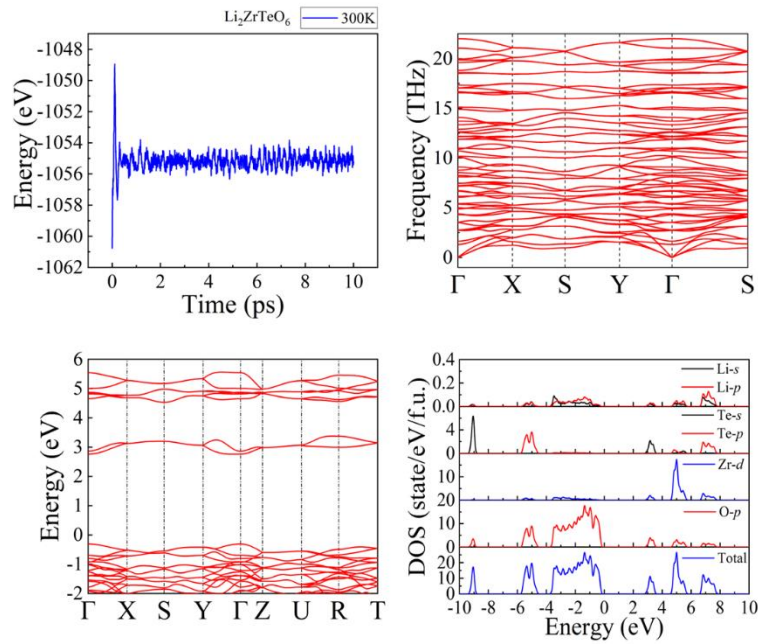

Figure S5. Energy variations under the AIMD simulations, phonon spectra at 300 K, energy band and density of states of  $\text{Li}_2\text{ZrTeO}_6$ .

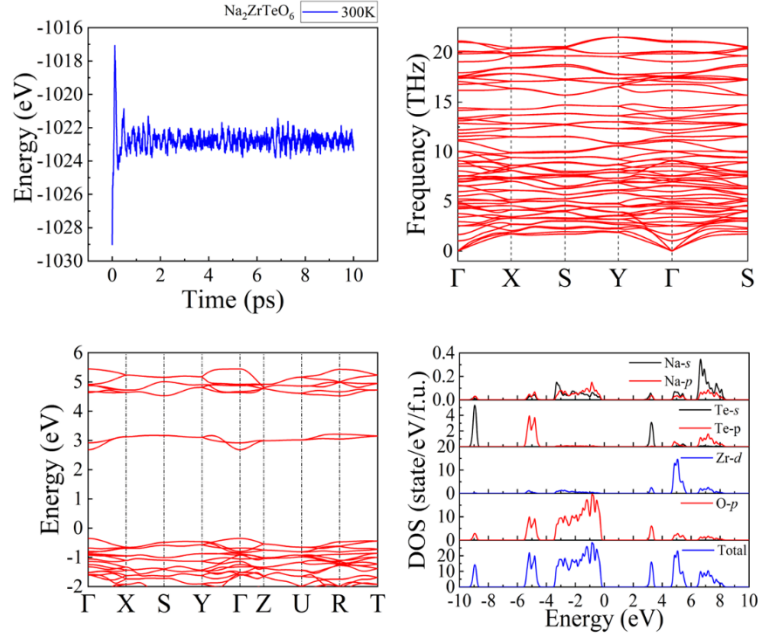

Figure S6. Energy variations under the AIMD simulations, phonon spectra at 300 K, energy band and density of states of  $\text{Na}_2\text{ZrTeO}_6$ .

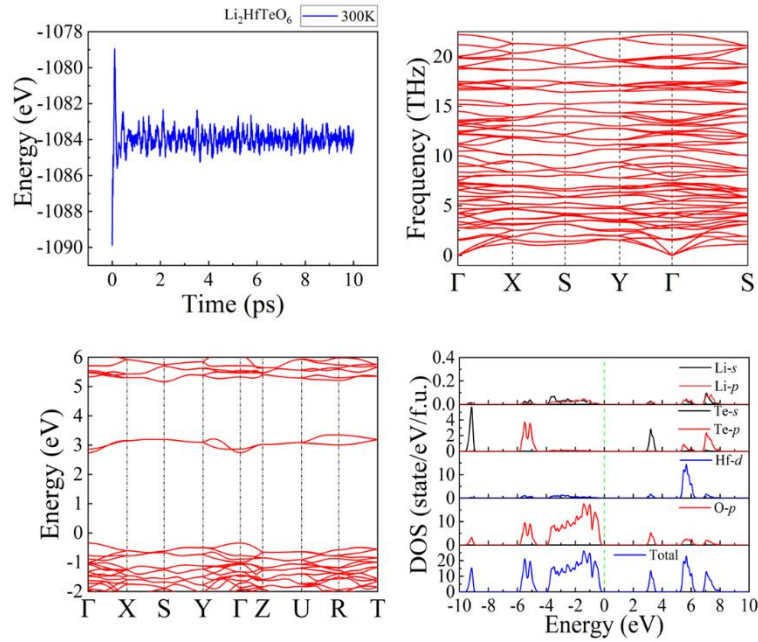

Figure S7. Energy variations under the AIMD simulations, phonon spectra at 300 K, energy band and density of states of  $\text{Li}_2\text{HfTeO}_6$ .

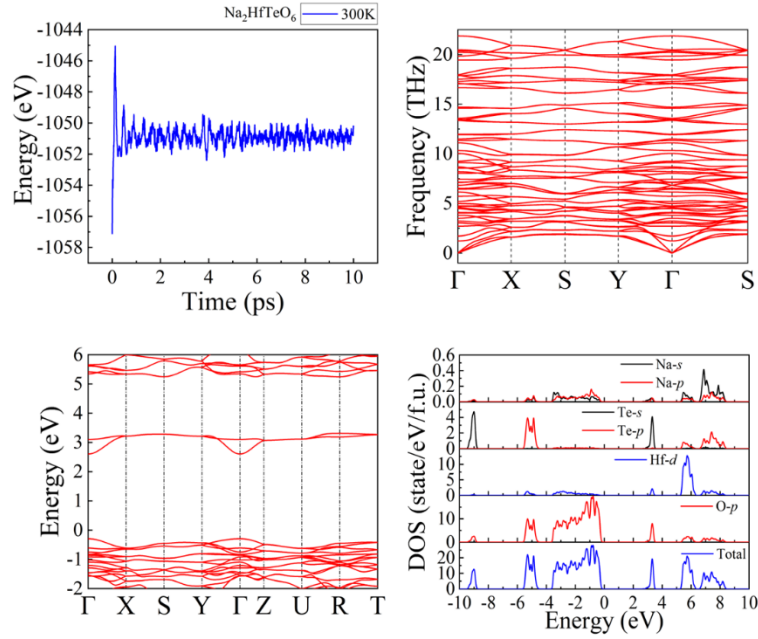

Figure S8. Energy variations under the AIMD simulations, phonon spectra at 300 K, energy band and density of states of  $\text{Na}_2\text{HfTeO}_6$ .

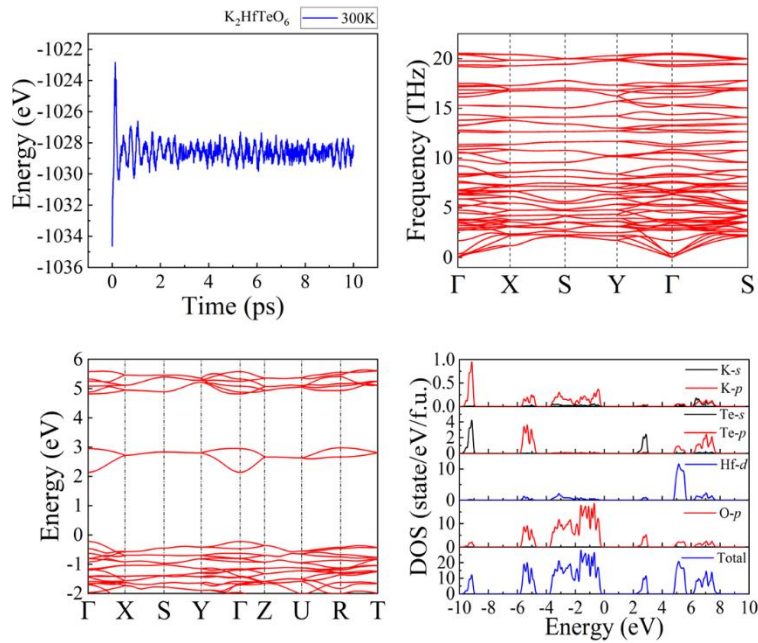

Figure S9. Energy variations under the AIMD simulations, phonon spectra at 300 K, energy band and density of states of  $\text{K}_2\text{HfTeO}_6$ .

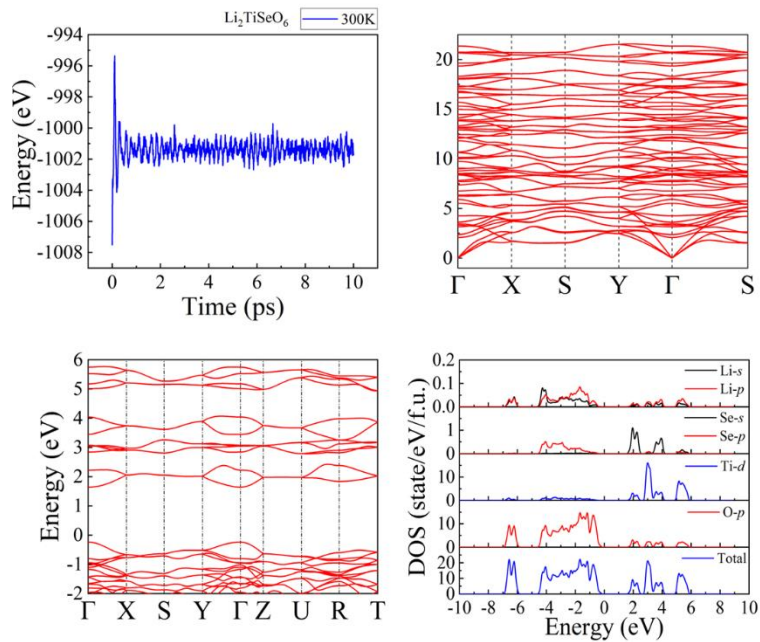

Figure S10. Energy variations under the AIMD simulations, phonon spectra at 300 K, energy band and density of states of  $\text{Li}_2\text{TiSeO}_6$ .

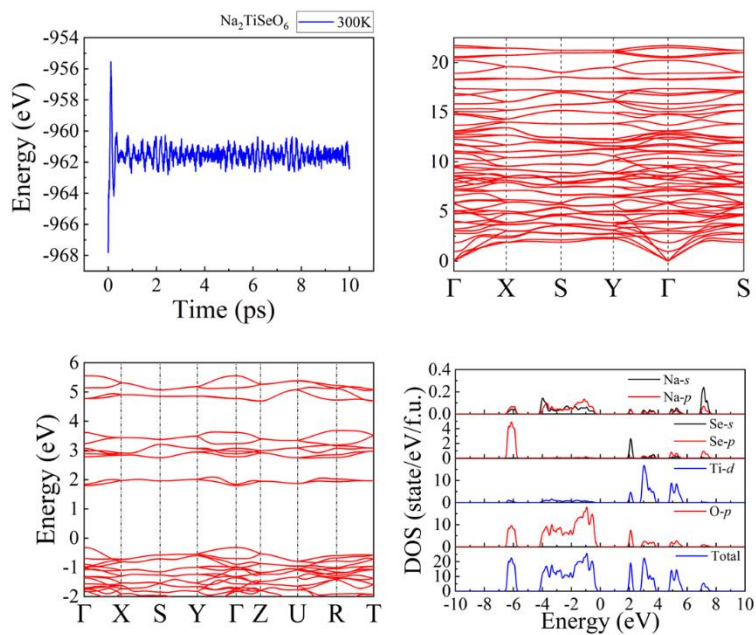

Figure S11. Energy variations under the AIMD simulations, phonon spectra at 300 K, energy band and density of states of  $\text{Na}_2\text{TiSeO}_6$ .

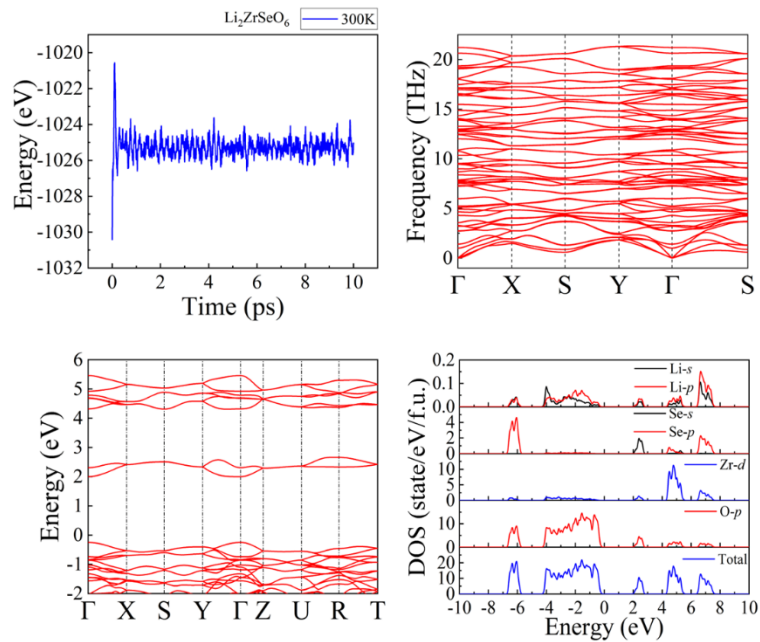

Figure S12. Energy variations under the AIMD simulations, phonon spectra at 300 K, energy band and density of states of  $\text{Li}_2\text{ZrSeO}_6$ .

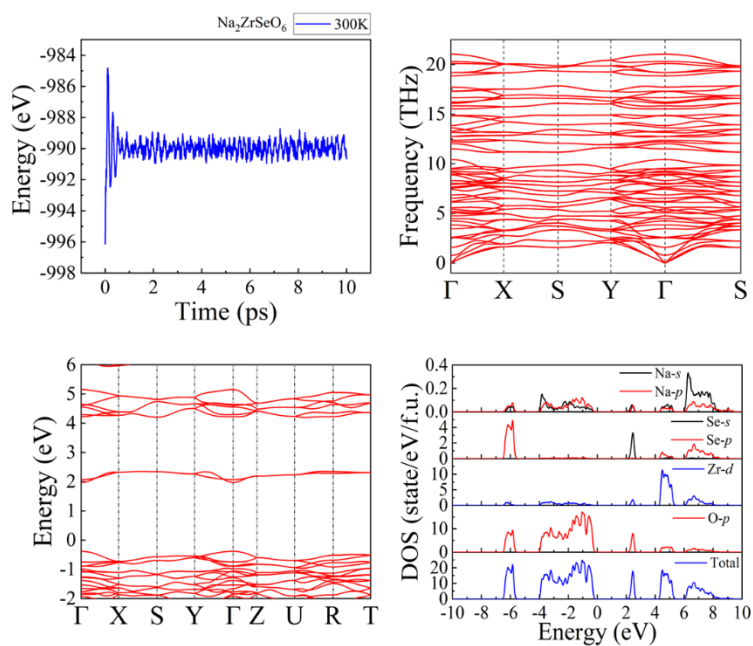

Figure S13. Energy variations under the AIMD simulations, phonon spectra at 300 K, energy band and density of states of  $\text{Na}_2\text{ZrSeO}_6$ .



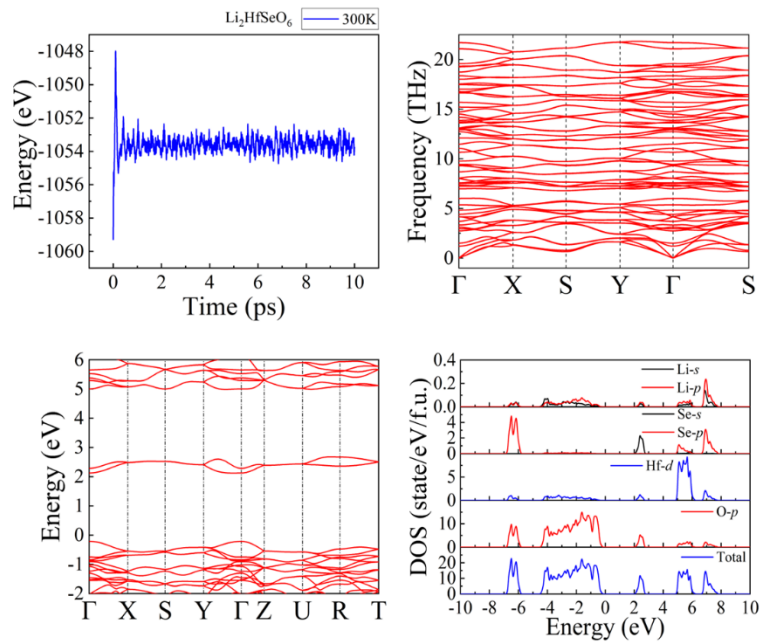

Figure S14. Energy variations under the AIMD simulations, phonon spectra at 300 K, energy band and density of states of  $\text{Li}_2\text{HfSeO}_6$ .

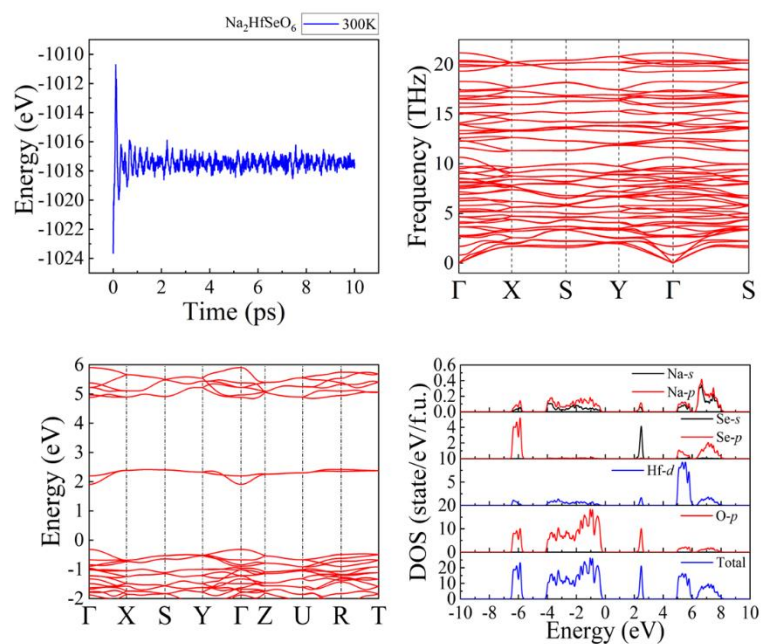

Figure S15. Energy variations under the AIMD simulations, phonon spectra at 300 K, energy band and density of states of  $\text{Na}_2\text{HfSeO}_6$ .

### 3 The results of AIMD and phonon spectra of unstable ABB'O

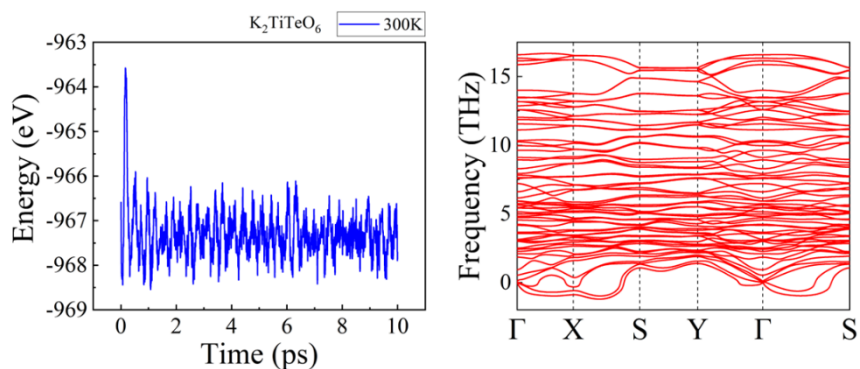

Figure S16. Energy variations under the AIMD simulations and phonon spectra at 300 K of  $K_2TiTeO_6$ .

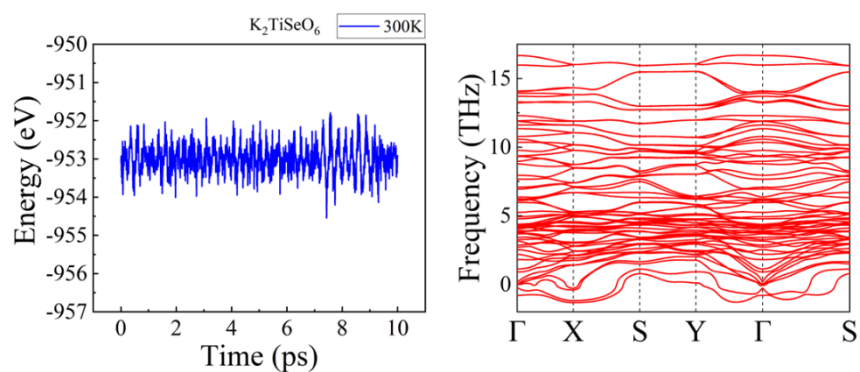

Figure S17. Energy variations under the AIMD simulations, phonon spectra at 300 K, energy band and density of states of  $K_2TiSeO_6$ .

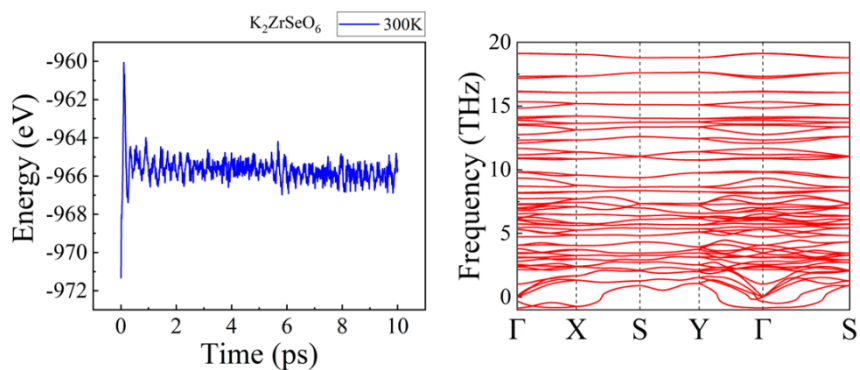

Figure S18. Energy variations under the AIMD simulations, phonon spectra at 300 K, energy band and density of states of  $K_2ZrSeO_6$ .

## 4 Calculated bandgap by different functionals and experimental value for LTTO

Table S1. Calculated bandgap (in unit of eV) by different functionals and experimental value for LTTO

|      | PBE  | PW91 | RPBE | PBEsol | AM05 | SCAN | MBJ  | HSE06 | Exp. |
|------|------|------|------|--------|------|------|------|-------|------|
| LTTO | 2.38 | 2.38 | 2.43 | 2.34   | 2.35 | 2.81 | 3.29 | 3.69  | 3.67 |

## 5 Elastic stiffness constants

Table S2. Elastic stiffness constants  $C_{ij}$  of  $A_2BB'O_6$

| formula       | Tensor $C_{ij}$ (GPa) |          |          |          |          |          |          |          |          |
|---------------|-----------------------|----------|----------|----------|----------|----------|----------|----------|----------|
|               | $C_{11}$              | $C_{12}$ | $C_{13}$ | $C_{22}$ | $C_{23}$ | $C_{33}$ | $C_{44}$ | $C_{55}$ | $C_{66}$ |
| $Li_2TiTeO_6$ | 258.82                | 90.61    | 116.07   | 358.51   | 100.26   | 261.07   | 113.53   | 143.45   | 122.52   |
| $Na_2TiTeO_6$ | 248.27                | 75.79    | 98.80    | 302.78   | 89.07    | 219.04   | 99.13    | 118.67   | 96.80    |
| $Li_2ZrTeO_6$ | 237.25                | 92.37    | 117.53   | 331.71   | 103.45   | 240.35   | 108.09   | 136.59   | 112.99   |
| $Na_2ZrTeO_6$ | 228.04                | 76.42    | 103.03   | 291.54   | 88.16    | 212.81   | 94.83    | 118.25   | 91.57    |
| $K_2ZrTeO_6$  | 247.18                | 78.97    | 97.67    | 263.93   | 89.18    | 190.32   | 93.31    | 107.69   | 85.78    |
| $Li_2HfTeO_6$ | 244.43                | 92.85    | 121.22   | 350.11   | 102.27   | 259.32   | 114.61   | 144.70   | 120.71   |
| $Na_2HfTeO_6$ | 242.37                | 83.21    | 110.39   | 314.20   | 91.42    | 230.29   | 103.45   | 128.93   | 103.24   |
| $K_2HfTeO_6$  | 255.07                | 80.21    | 98.65    | 272.74   | 89.87    | 197.08   | 97.39    | 110.62   | 90.73    |
| $Li_2TiSeO_6$ | 284.61                | 80.33    | 108.60   | 365.67   | 100.13   | 274.59   | 118.73   | 141.82   | 121.57   |
| $Na_2TiSeO_6$ | 271.59                | 68.79    | 88.26    | 305.73   | 90.38    | 226.73   | 106.27   | 113.49   | 98.68    |
| $Li_2ZrSeO_6$ | 265.01                | 81.35    | 109.14   | 337.92   | 102.12   | 248.75   | 111.47   | 132.54   | 109.65   |
| $Na_2ZrSeO_6$ | 257.55                | 72.82    | 96.56    | 300.13   | 91.60    | 220.36   | 102.43   | 116.48   | 94.10    |
| $Li_2HfSeO_6$ | 273.71                | 82.88    | 113.35   | 358.63   | 102.45   | 267.26   | 118.44   | 141.58   | 118.18   |
| $Na_2HfSeO_6$ | 266.19                | 74.09    | 98.52    | 313.90   | 91.43    | 231.10   | 107.91   | 121.27   | 101.01   |
| $K_2HfSeO_6$  | 273.09                | 73.94    | 83.48    | 269.73   | 86.96    | 191.51   | 100.06   | 98.01    | 90.79    |

## 6 Total dipole moment of unit cell

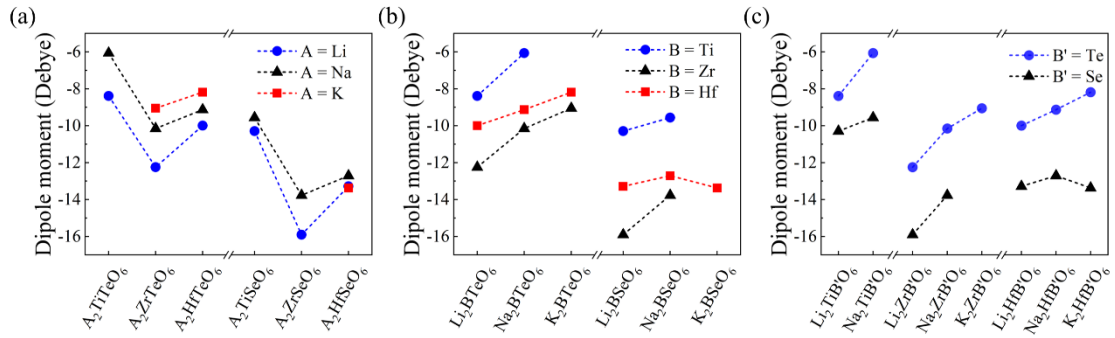

Figure S19. Total dipole moment of unit cell with different atoms at (a) A-site, (b) B-site and (c) B'-site of ABB'O.

## 7 THz adsorption spectrum of ABB'O

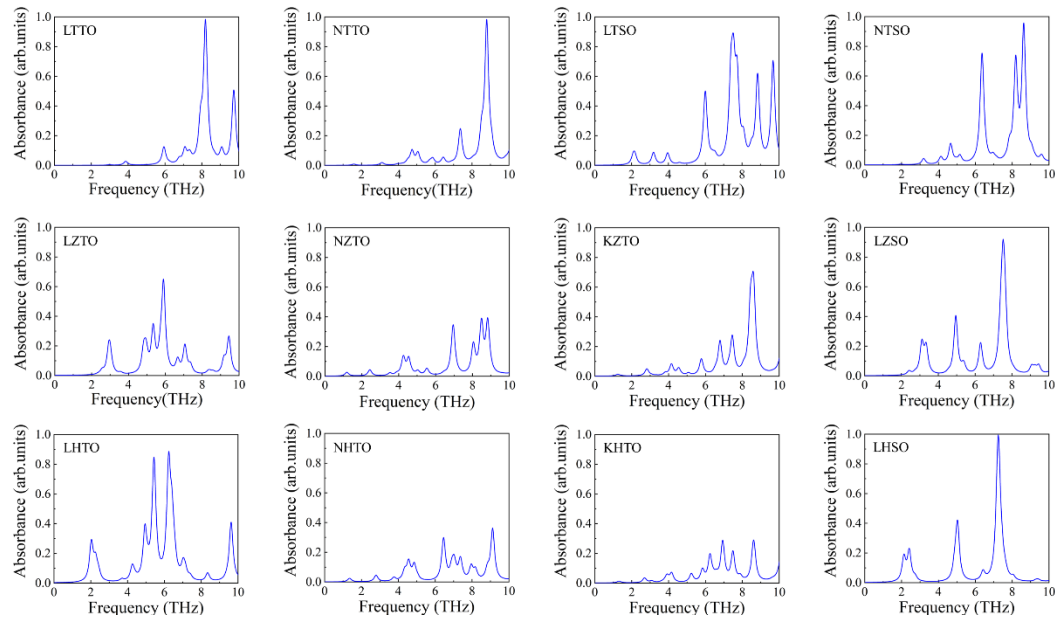

Figure S20. Calculated THz absorption spectra of ABB'O (others are presented in main text).
